# Supplementary material for: Physiological and Molecular Responses of Zoysia japonica to Rust Infection
Source: MDPI journal article supplement (doi:10.3390/ijms23084185), 2022-04-10
Supplement: s1 [file s1]

**Supplemental Table S1.** Primer sequences of RT-qPCR

| Gene                               | Forward primer (5'-3')      | Reverse primer (5'-3')        |
|------------------------------------|-----------------------------|-------------------------------|
| Zjn_sc00061.1.g0107<br>0.1.sm.mkhc | ATGTCCTGCTCTTTC<br>ACTAACC  | AGGTGCTTGGGAAGA<br>ACATAC     |
| Zjn_sc00007.1.g0060<br>0.1.am.mkhc | CTTGCGTTGCTAGGT<br>GTCT     | GATCCTCCTCTCATCA<br>CCAATAAC  |
| Zjn_sc00014.1.g0125<br>0.1.sm.mkhc | CATCCCTGACTTGTT<br>GAGTGT   | CCAGTCTCTTCTTG TG<br>TCCTTATC |
| Zjn_sc00026.1.g0089<br>0.1.sm.mk   | TCAAGTCCACGATGC<br>AGATATAC | GCGGCTGCTGTAGATG<br>AA        |
| Zjn_sc00015.1.g0122<br>0.1.sm.mkhc | GACCTCTGTGCCTCT<br>TGTATC   | CGGACCTGAACTGTCA<br>TTGT      |
| Zjn_sc00009.1.g1066<br>0.1.sm.mkhc | CAGGGCCAAGAGTC<br>GAATAAA   | CAATAGAGGTGAGGT<br>GACAGAATC  |
| Zjn_sc00065.1.g0007<br>0.1.am.mkhc | GACTGCCGCAAGAA<br>GTTAGA    | CCTCTGAGATGGACGA<br>CTTTG     |
| Zjn_sc00011.1.g0743<br>0.1.sm.mkhc | GAAGCCGTCTCCGA<br>AAGATAG   | CCAGCCATTGCAAGAG<br>AAAC      |
| Zjn_sc00034.1.g0135<br>0.1.am.mk   | TCACGCATATCGAGC<br>CTAAC    | CCGCAGGATTGTTGCT<br>ATTG      |
| Zjn_sc00112.1.g0008<br>0.1.sm.mkhc | CTTACATCCAGCAGC<br>TAGAGAC  | AGTGACCCGGAGGAT<br>ACA        |
| Zjn_sc00043.1.g0307<br>0.1.am.mkhc | AGCTGAGGATGCTCT<br>TTCAC    | GTTTGCCACATTCCCT<br>GTTG      |
| Zjn_sc00086.1.g0192<br>0.1.am.mkhc | ATACGACGACATGGC<br>AGAAC    | GGAAGGGAAGATGTT<br>CAGAGTC    |
| Zjn_sc00046.1.g0013<br>0.1.am.mkhc | ATGTTAGTTGGTGCA<br>TATC     | GTGGACATAATCTGGA<br>ATAG      |
| Zjn_sc00085.1.g0051<br>0.1.sm.mkhc | TCTCAAGGGTGAGG<br>CTAAGA    | TACGTGACAGTGCCTA<br>CAAAG     |
| <i>ZjActin</i>                     | GCTCAGTCCAAGAG<br>AGGTATTC  | TGATGCCAGATCTTCT<br>CCATATC   |

**Supplemental Table S2.** Variation multiples of the TOP 10 differentially expressed genes

| Gene ID                        | Fold change | Description                                                                                 |
|--------------------------------|-------------|---------------------------------------------------------------------------------------------|
| RR2 vs RS1                     |             |                                                                                             |
| Zjn_sc00105.1.g01770.1.sm.mkhc | 10.23896141 | PF00170:bZIP transcription factor PF12498:Basic leucine-zipper C terminal                   |
| Zjn_sc00079.1.g00420.1.sm.mk   | 9.69963256  | PF03018:Dirigent-like protein                                                               |
| Zjn_sc00045.1.g00440.1.am.mk   | 9.631664587 | PF00067:Cytochrome P450                                                                     |
| Zjn_sc00061.1.g00840.1.am.mkhc | 8.677039724 | PF00704:Glycosyl hydrolases family 18                                                       |
| Zjn_sc00136.1.g00270.1.am.mkhc | 8.591381602 | Cytochrome P450                                                                             |
| Zjn_sc00036.1.g03030.1.sm.mk   | 8.533376139 | Chlorophyll A-B binding protein                                                             |
| Zjn_sc00029.1.g05340.1.sm.mkhc | 8.533270983 | Profilin                                                                                    |
| Zjn_sc00019.1.g00820.1.am.mk   | 8.15452055  | Chlorophyll A-B binding protein                                                             |
| Zjn_sc00004.1.g01410.1.sm.mk   | 8.084498851 | Photosystem I reaction centre subunit III                                                   |
| Zjn_sc00009.1.g06990.1.am.mk   | 8.000347921 | Multicopper oxidase PF07731:Multicopper oxidase PF07732:Multicopper oxidase                 |
| RR1 vs RS1                     |             |                                                                                             |
| Zjn_sc00080.1.g00140.1.am.mk   | 10.43880199 | Plant antimicrobial peptide                                                                 |
| novel.209                      | 10.04004609 | -                                                                                           |
| novel.470                      | 9.998686012 | -                                                                                           |
| Zjn_sc00029.1.g00490.1.sm.mk   | 9.609114204 | -                                                                                           |
| Zjn_sc00048.1.g00650.1.sm.mkhc | 9.510304804 | Eukaryotic glutathione synthase, ATP binding domain PF03199:Eukaryotic glutathione synthase |
| Zjn_sc06150.1.g00010.1.am.mk   | 9.27628232  | -                                                                                           |
| novel.860                      | 9.199508511 | -                                                                                           |
| novel.894                      | 9.161751983 | -                                                                                           |
| novel.509                      | 9.158733433 | -                                                                                           |
| Zjn_sc00021.1.g02260.1.am.mk   | 8.973213948 | -                                                                                           |
| RR2 vs RS2                     |             |                                                                                             |
| Zjn_sc00004.1.g08640.1.sm.mk   | 26.76601782 | Late embryogenesis abundant (LEA) group 1                                                   |
| novel.860                      | 11.81139662 | -                                                                                           |

|                                |             |                                                                                             |
|--------------------------------|-------------|---------------------------------------------------------------------------------------------|
| Zjn_sc00050.1.g03350.1.sm.mk   | 11.68672099 | -                                                                                           |
| Zjn_sc00004.1.g04210.1.am.mk   | 10.38771445 | Sugar (and other) transporter PF05042:Caleosin related protein                              |
| Zjn_sc00010.1.g03310.1.am.mk   | 10.26852814 | -                                                                                           |
| novel.209                      | 10.18418016 | -                                                                                           |
| Zjn_sc00735.1.g00010.1.am.mk   | 10.08503895 | Salt stress response/antifungal                                                             |
| novel.205                      | 10.07338932 | -                                                                                           |
| Zjn_sc00006.1.g04150.1.sm.mkhc | 10.04673758 | -                                                                                           |
| Zjn_sc00048.1.g00650.1.sm.mkhc | 10.04554595 | Eukaryotic glutathione synthase, ATP binding domain PF03199:Eukaryotic glutathione synthase |
| <hr/> RS2 vs RS1               |             |                                                                                             |
| Zjn_sc00112.1.g00250.1.sm.mk   | 10.58316139 | NOP5NT (NUC127) domain                                                                      |
| Zjn_sc00027.1.g01530.1.sm.mk   | 8.614229308 | Chlorophyll A-B binding protein                                                             |
| Zjn_sc00045.1.g00440.1.am.mk   | 8.538952384 | Cytochrome P450                                                                             |
| Zjn_sc00105.1.g01770.1.sm.mkhc | 8.431686706 | bZIP transcription factor PF12498:Basic leucine-zipper C terminal                           |
| Zjn_sc00036.1.g03030.1.sm.mk   | 7.766097114 | Chlorophyll A-B binding protein                                                             |
| Zjn_sc00019.1.g00820.1.am.mk   | 7.688367413 | Chlorophyll A-B binding protein                                                             |
| Zjn_sc00004.1.g00540.1.sm.mkhc | 7.672365572 | EamA-like transporter family                                                                |
| Zjn_sc00037.1.g00930.1.am.mk   | 7.377783225 | Chlorophyll A-B binding protein                                                             |
| Zjn_sc00066.1.g01570.1.am.mk   | 7.375853669 | -                                                                                           |
| Zjn_sc00001.1.g06810.1.sm.mkhc | 7.366299515 | Chlorophyll A-B binding protein                                                             |
| <hr/> RR2 vs RR1 v RS2vs RS1   |             |                                                                                             |
| RR2 vs RR2                     |             |                                                                                             |
| Zjn_sc00054.1.g00460.1.am.mk   | 7.331675014 | Protein of unknown function (DUF3339)                                                       |
| Zjn_sc00103.1.g00660.1.am.mk   | 7.017735734 | Sugar (and other) transporter                                                               |
| Zjn_sc00027.1.g00760.1.sm.mk   | 6.861140978 | -                                                                                           |
| Zjn_sc00147.1.g00830.1.am.mk   | 6.506860545 | PF00249:Myb-like DNA-binding domain                                                         |

|                                |             |                                                                 |
|--------------------------------|-------------|-----------------------------------------------------------------|
| Zjn_sc00061.1.g01390.1.am.mk   | 6.423035385 | -                                                               |
| Zjn_sc00001.1.g11530.1.am.mk   | 6.395054587 | Transferase family                                              |
| Zjn_sc00087.1.g01140.1.am.mk   | 6.373924331 | Chalcone and stilbene synthases,<br>N-terminal domain synthases |
| Zjn_sc00001.1.g08520.1.am.mk   | 6.276480709 | -                                                               |
| Zjn_sc00007.1.g10580.1.am.mk   | 6.213503135 | -                                                               |
| Zjn_sc00029.1.g01060.1.am.mk   | 6.084428    | --                                                              |
| S2 vs S1                       |             |                                                                 |
| Zjn_sc00330.1.g00010.1.sm.mkhc | 7.090687593 | ABC1 family                                                     |
| Zjn_sc00060.1.g00600.1.am.mk   | 6.957861141 | -                                                               |
| Zjn_sc00012.1.g03460.1.am.mk   | 6.892605828 | -                                                               |
| Zjn_sc00015.1.g03490.1.am.mkhc | 6.748853752 | Alpha-amylase C-terminal beta-<br>sheet domain                  |
| Zjn_sc00044.1.g01520.1.am.mk   | 6.583333202 | PHD-zinc-finger like domain                                     |
| Zjn_sc00015.1.g01643.1.br      | 6.434631372 | -                                                               |
| Zjn_sc00037.1.g02950.1.am.mk   | 6.304302437 | -                                                               |
| Zjn_sc00008.1.g07420.1.am.mk   | 5.802741906 | -                                                               |
| Zjn_sc00015.1.g01646.1.br      | 5.755534464 | Retrotransposon gag protein                                     |
| Zjn_sc00043.1.g02190.1.sm.mkhc | 5.71591855  | -                                                               |

---
